# Supplementary material for: Variation in shortwave water vapour continuum and impact on clear-sky shortwave radiative feedback
Source: Copernicus journal article supplement (doi:10.5194/egusphere-2024-3051), 2024-11-21
Supplement: Supplementary file [file egusphere-2024-3051-AC2-supplement.pdf]

## Authors' response to reviewer comments

The authors thank the reviewer for his/her time and positive comments on their manuscript. These comments are addressed below. The necessary tracked changes, which hopefully will improve on the previous version, have been made to the paper. These comments are addressed on a point-by-point basis with his responses in red

### RC2

The paper "Variation in shortwave water vapour continuum and impact on clear-sky shortwave radiative feedback" by Menang et al. provides an analysis of the differences in shortwave radiative feedback resulting from using different specifications of the water vapor continuum. This analysis uses idealized moist adiabat profiles, which is a standard approach used in similar studies, and is competently done. The results are clearly presented.

There are some serious issues with this manuscript that are detailed below. When they are resolved, it would still be questionable to me whether this study is of sufficient import to merit publication. The question it addresses doesn't seem to be one that people in the field are asking, and the result of the study indicates that the lack of interest may be due to people intuitively understanding that the shortwave water vapour continuum isn't too important for climate, as this study indicates (even if one accepts the premise of this paper that there is a fair amount of uncertainty in the shortwave continuum). I guess I would come down on the side of publishing this manuscript after revision, but the editors should know that it is a close call.

The main issue with this manuscript is that insufficient context is provided for the development of the different continuum versions, and the little context that is provided is misleading. The paper needs to provide more information about the observational foundation for each continuum version, enough so a reader can have an informed perspective on each version that is being analyzed. An especially glaring omission is that no mention is made of the numerous recent laboratory studies by the Campargue group at Grenoble that provided the basis for the development of self continuum in MT\_CKD\_3.2 (and subsequent versions). These measurements were performed using the highly accurate cavity ring-down technique, and without that knowledge a reader would not have the context to evaluate the results presented in this manuscript.

The limited context on the continuum versions that the manuscript provides suggests that the CAVIAR provides a more up-to-date and accurate specification (e.g. lines 111-115 and 445-451) of the continuum, which is most likely the opposite of the situation. Prior to MT\_CKD\_3.2, it was clear from multiple observational studies that the self continuum in MT\_CKD was too weak in near-infrared windows. Two sets of measurements were available at that time, those from CAVIAR and those from the Campargue group, which provided conflicting information about its strength. The MT\_CKD developers decided that the cavity ring-down measurements, which are considered to be highly accurate, provided a better foundation for a new self continuum version than the CAVIAR measurements, which were performed with a technique that has difficulty measuring weak absorbers and provided results showing suspiciously flat behavior within and in consecutive near-infrared water vapor windows. The choice of using the Campargue group measurements was not a difficult one.

The later Elsey et al. study did nothing to modify this perspective – although its authors did a terrific job in a challenging analysis, the uncertainty in the specification of attenuation by aerosols made that result difficult to rely upon.

The authors of this manuscript must present context so readers can understand the basics of this situation and should not imply in any way that the CAVIAR continuum is considered to be more up-to-date since that would be misleading at best.

Another aspect of the context deficiencies in this manuscript is the lack of any mention whatsoever of the foreign continuum, as well as its role in the continuum versions utilized in this study. Even though it is less important than the self continuum in near-infrared windows, it would be remiss to not discuss it so that readers can understand its level of relevance to the subject at hand, especially since the Campargue group has also provided accurate laboratory measurements of its strength in these windows that have provided the foundation for a revision of MT\_CKD.

Fig. 4 is an important to the result presented in this study, and its discussion (lines 398-406) is inadequate in several ways:

1. An intriguing thing about the results in Fig. 4 is that the shortwave feedback from CAVIAR is less than that due to MT\_CKD at higher temperatures. One would think that this result is due to the absorption in CAVIAR being less than MT\_CKD in some piece of the shortwave spectral region. However, no explanation is provided of why this happen -- previously the manuscript discusses only that CAVIAR is stronger than MT\_CKD.
2. It is incorrect that the water vapor continuum has not been measured at  $> 8000 \text{ cm}^{-1}$ . The measurements in Campargue et al. 2016 go up to  $8300 \text{ cm}^{-1}$  and there is also a measurement by Fulghum and Tilleman near  $10,000 \text{ cm}^{-1}$ . (See Fig. 13 of Campargue et al, 2016.)
3. It should be mentioned here that CAVIAR and MT\_CKD are very close to each other at higher wavenumbers since (I believe) that CAVIAR was constructed to agree with MT\_CKD above  $\sim 8000 \text{ cm}^{-1}$ .
4. The use of the word “extrapolated” here is likely to mislead readers. The authors should provide a basic explanation of how MT\_CKD (and therefore CAVIAR, given the comment directly above) obtains its absorption coefficients in regions with no or limited measurements, i.e. through the derivation of a constrained line shape.

Additionally, in several instances the manuscript mentions the longwave region and the water vapour continuum in the longwave. These are not relevant to the subject of this paper and will confuse the reader more than they will help the reader. I recommend that all mentions of the longwave (including in figures) be removed, which should allow the distinction between versions 3.2 and 4.1.1 to be eliminated, thereby simplifying the study.

- These constructive comments and suggestions from the reviewer are highly appreciated.
- A brief description of the major revisions of the MT\_CKD model relevant to our work has been included in the manuscript as suggested by the reviewer. Initially this was not included because we assumed that it has been adequately covered in the literature (although we did not point the readers to any). We thank the reviewer for pointing out this shortcoming.
- The authors have also revised and extended the discussion on CAVIAR continuum model. Of course, the authors do not consider this model to be more up-to-date than the MT\_CKD model.

- Both the self and foreign continua are used in our work. Our discussion on the developments of the MT\_CKD and CAVIAR models now includes both the self and foreign continua.
- We thank the reviewer for the comments related to Figure 4 of the submitted manuscript. The discussion relating to this figure has been revised to address the issues raised by the reviewer.
- We agree with the reviewer that including any discussion and analysis on the longwave continuum is irrelevant to the paper. The paper has been revised as recommended. This has of course led to the removal of MT\_CKD\_3.2 from our analysis.

Specific comments:

25 – MT\_CKD versions are referred to with an underscore before the version number (e.g. MT\_CKD\_4.1.1) by its developers (e.g, see Mlawer et al., 2023), so this manuscript should follow that convention.

- Thank you for pointing this out. We have corrected the manuscript as recommended.

40 – no comma after “investigate”.

- This typo has been corrected.

82 – “with little or no justification”. The authors should explain what this means or remove it. By the context, it seems like the people that the authors believe have shown little or no justification for this selection are the respective developers of the climate models. I would think that these developers would have used the most recent version of the MT\_CKD model at the time their RT codes were built. That seems very logical, but this text implies that this choice was made for no reason.

- We agree with the reviewer that the phrase ‘with little or no justification’ is misleading. Of course, climate model developers (and other users of the MT\_CKD model) will use the most recent of the MT\_CKD model, as it reflects the current understanding of continuum absorption. The misleading phrase has been removed from this sentence.

110-114 – Some mention should be made of the source of the CAVIAR continuum for high wavenumbers. As mentioned above, it agrees with MT\_CKD\_4.1.1, which I think it due to a choice made by the CAVIAR developers.

- More information on the CAVIAR continuum has been added to the manuscript.

110-122 – It would be useful to provide, in addition to the publications referenced here, the release years of each version.

Also, it would be worth notifying the readers that after this study was completed a significant change (v4.3) was made to the near-IR foreign continuum in MT\_CKD that would impact the absorption of solar radiation. The authors could point the readers to [https://github.com/AER-RC/MT\\_CKD\\_H2O/wiki/What's-New](https://github.com/AER-RC/MT_CKD_H2O/wiki/What's-New).

This development makes this study a little less up-to-date, but it should be mentioned for completeness.

- The release years for each continuum model has been included in the manuscript.
- We thank the reviewer for pointing us to the recent version of the MT\_CKD model and for the suggestion to include it in the paper. This has been done.

117 – Since MT\_CKD\_3.2 is identical to MT\_CKD\_4.1.1, there is no reason to include both in the analysis since it just unnecessarily complicates the paper for a reader. Instead, just include v4.1.1 and mention that it includes a major revision to the self continuum compared to v2.5.

- Thank you for this comment. The text has been revised accordingly

166, 239-240 – The actual name of this code is RRTM for GCMs (not “Rapid Radiative Transfer Model...”).

- The authors do not understand this correction from the reviewer. We understand that RRTM stands for ‘Rapid Radiative Transfer Model’ (see Mlawer et al 1997) while RRTMG stands for ‘Rapid Radiative Transfer Model for GCMs’ (see, e.g., [http://rtweb.aer.com/rrtm\\_frame.html](http://rtweb.aer.com/rrtm_frame.html), Pincus et al 2019).

173-176 – This sentence is awkward, please rephrase.

- The sentence has been rephrased as recommended.

190 – I don’t think it is sufficient to use the “RGB” jargon without further details provided in this manuscript. It shouldn’t be up to the reader to go back to a previous paper to figure this out. Complete detail isn’t necessary here, but enough so a reader understands the general principle behind this choice.

- This portion of the manuscript has been re-written with more details on ‘RGB’.

190 – “resulted in”

- Corrected

200-202 – Is there a point to mentioning the longwave tables and showing the longwave results (203-205, Figure 2) in this paper? They seem irrelevant to the point of this paper.

- We agree with the reviewer that any results/discussion relating to the longwave in this section is irrelevant to this paper and have now been removed.
- We have also moved this section of the manuscript to an appendix because it has no direct bearing on the main focus of the paper.

240-241 – It is unclear why Pincus et al. is used as a reference for how widely used RRTMG is.

- Appropriate references for how widely used RRTMG is have been provided.

255 – “solar constant” is well-established term in science and has a value of  $\sim 1360 \text{ W/m}^2$ . Another term should be used here for the quantity (e.g. extraterrestrial solar irradiance”) being referred to.

- Thank you for this comment. We have replaced ‘solar constant’ with ‘reduced total solar irradiance’

256 – “with no diurnal cycle” - It seems clear from the details provided in this section that no diurnal cycle is being used, so perhaps it is more confusing than elucidating to include this phrase.

- The phrase ‘with no diurnal cycle’ has been removed from the manuscript.

261 – “an albedo of 0.2.”

- This has been corrected

262, 269, 272, 278 – “was”.

- Corrected

288 - “adjusted”

- Corrected

289 – “calculated”

- Corrected

The present tense is being used elsewhere in this section.

Section 3.1.1 – This section is completely unnecessary since it doesn’t deal with the shortwave nor the water vapor continuum. Therefore, having it be the first result in the “Results” section is confusing. It should be removed from the paper. The statement at line 321-322 can be modified to directly refer to the (say) Kluft et al. value of  $-1.8 \text{ W m}^{-2} \text{ K}^{-1}$ .

- Section 3.1.1 has been removed from the manuscript as recommended by the reviewer. Line 321-322 has also been revised.

324-330 – These sentences are repetitive and should be streamlined.

- Thank you for this comment. The sentences have been streamlined as recommended.

337 – No comma after “expected”.

- Corrected

348 – No comma after “temperature”.

– Corrected

351, 367, 371 - “difference” would be better than “error” and consistent with the axis labels in Fig. 4.

– Thank you for this comment. The manuscript has been revised as recommended.

371 – Perhaps “magnitude of the relative error” since it is negative.

– We agree with reviewer. The manuscript has been revised.

386-387 – “Shortwave water vapour absorption in windows between absorption band...”. Without such a qualification, the current sentence is incorrect.

– The authors appreciate this correction. The sentence has been corrected.

389 – “atmospheric”

– Corrected

398 – Would “contributing to the substantial differences in  $\lambda_{SW}$  there” be closer to the authors’ meaning than the current text? (similar comment related to the use of the word “uncertainty” on line 400.)

– The authors are referring to the results presented in their work and thus ‘differences’ would be a more appropriate word as suggested by the reviewer.

423 – Perhaps “a range of fixed surface temperatures...”

– Thank you for this suggestion. The manuscript has been revised accordingly.

430 – The use of a semi-colon here is awkward.

– The semi-colon has been and this portion of the manuscript re-written.

434, 439 – As mentioned above, “error” is not a good way to refer to this since there is no reference result with respect to which an error can be defined.

– We agree with the reviewer. This has been corrected.
